# Supplementary material for: Dissecting the Interaction of FGF8 with Receptor FGFRL1
Source: PubMed Central journal article supplement (PMC7600612; doi:10.3390/biom10101399), 2020-10-01
Supplement: biomolecules-10-01399-s001.pdf [file biomolecules-10-01399-s001.pdf]

# Dissecting the Interaction of FGF8 with Receptor FGFR1

 Lei Zhuang <sup>1</sup>, Monique Vogel <sup>1</sup>, Peter M. Villiger <sup>2</sup> and Beat Trueb <sup>1,\*</sup>
<sup>1</sup> Department for BioMedical Research, University of Bern, 3008 Bern, Switzerland; lei.zhuang@dbmr.unibe.ch (L.Z.); monique.vogel@dbmr.unibe.ch (M.V.)

<sup>2</sup> Department of Rheumatology, University Hospital, 3010 Bern, Switzerland; peter.villiger@insel.ch

\* Correspondence: beat.trueb@dbmr.unibe.ch

**Table S1.** Primers used to prepare cDNA clones (5'-3')\*.

|                         |                                                                 |
|-------------------------|-----------------------------------------------------------------|
| Ig123                   |                                                                 |
| Up                      | <u>CCGGATCCGGACAGGCCGAGATG</u>                                  |
| Low                     | <u>CACGAATTCAGTGGTGATGGTGATGATGTGGGTCTGGCAGCACGGT</u>           |
| Ig1                     |                                                                 |
| Up:                     | <u>CCGGATCCGGACAGGCCGAGATG</u>                                  |
| Low:                    | <u>CACGAATTCAGTGGTGATGGTGATGATGATCCAGCACGACGAGGGT</u>           |
| Ig2                     |                                                                 |
| Up:                     | <u>CCGGATCCGGACAGGCCGAGATG</u>                                  |
| Low:                    | <u>CACGAATTCAGTGGTGATGGTGATGATGGATCACATCCACCTTGTA</u>           |
| Ig2 overlap signal-Ig2  |                                                                 |
| Up:                     | GCCGCCGCCCGAG'ATGACATTAGCCCAGGGAAG                              |
| Low:                    | TGGGCTAATGTCAT'CTCGGGCGGCGGCGGC                                 |
| Ig3                     |                                                                 |
| Up:                     | <u>CCGGATCCGGACAGGCCGAGATG</u>                                  |
| Low:                    | <u>CACGAATTCAGTGGTGATGGTGATGATGTGGGTCTGGCAGCACGGT</u>           |
| Ig3 overlap signal-Ig3  |                                                                 |
| Up:                     | CGAGGCCCGCC'GTGATCCAGCGGACCCG                                   |
| Low:                    | CCGCTGGATCACA'GGGGGCCTCGGGCGGC                                  |
| Ig12                    |                                                                 |
| Up:                     | <u>CACGAATTC</u> CCGGACAGGCCGAGATG                              |
| Low:                    | GA <u>AGGATCCT</u> CAGTGATGGTGATGGTGATGGGGTGGGATCACATCCACCTTGTA |
| Ig13                    |                                                                 |
| Up:                     | <u>CACGAATTC</u> CCGGACAGGCCGAGATG                              |
| Low:                    | GA <u>AGGATCCT</u> CAGTGATGGTGATGGTGATGGGGTGGCAGCACGGTGAGGA     |
| Ig13 overlap Ig1-Ig3    |                                                                 |
| Up:                     | AGCCAGCAGTGG'CAGCGGACCCGTTCCAAG                                 |
| Low:                    | ACGGGTCCGCTG'CCACTGCTGGCTGGCGGG                                 |
| Ig23                    |                                                                 |
| Up:                     | <u>CACGAATTC</u> CCGGACAGGCCGAGATG                              |
| Low:                    | GA <u>AGGATCCT</u> CAGTGATGGTGATGGTGATGGGGTGGCAGCACGGTGAGGA     |
| Ig23 overlap signal-Ig2 |                                                                 |
| Up:                     | GCCGCCGCCCGAG'ATGACATTAGCCCAGGGAAG                              |
| Low:                    | TGGGCTAATGTCAT'CTCGGGCGGCGGCGGC                                 |

\* Underlined residues mark the restriction sites used for subcloning.

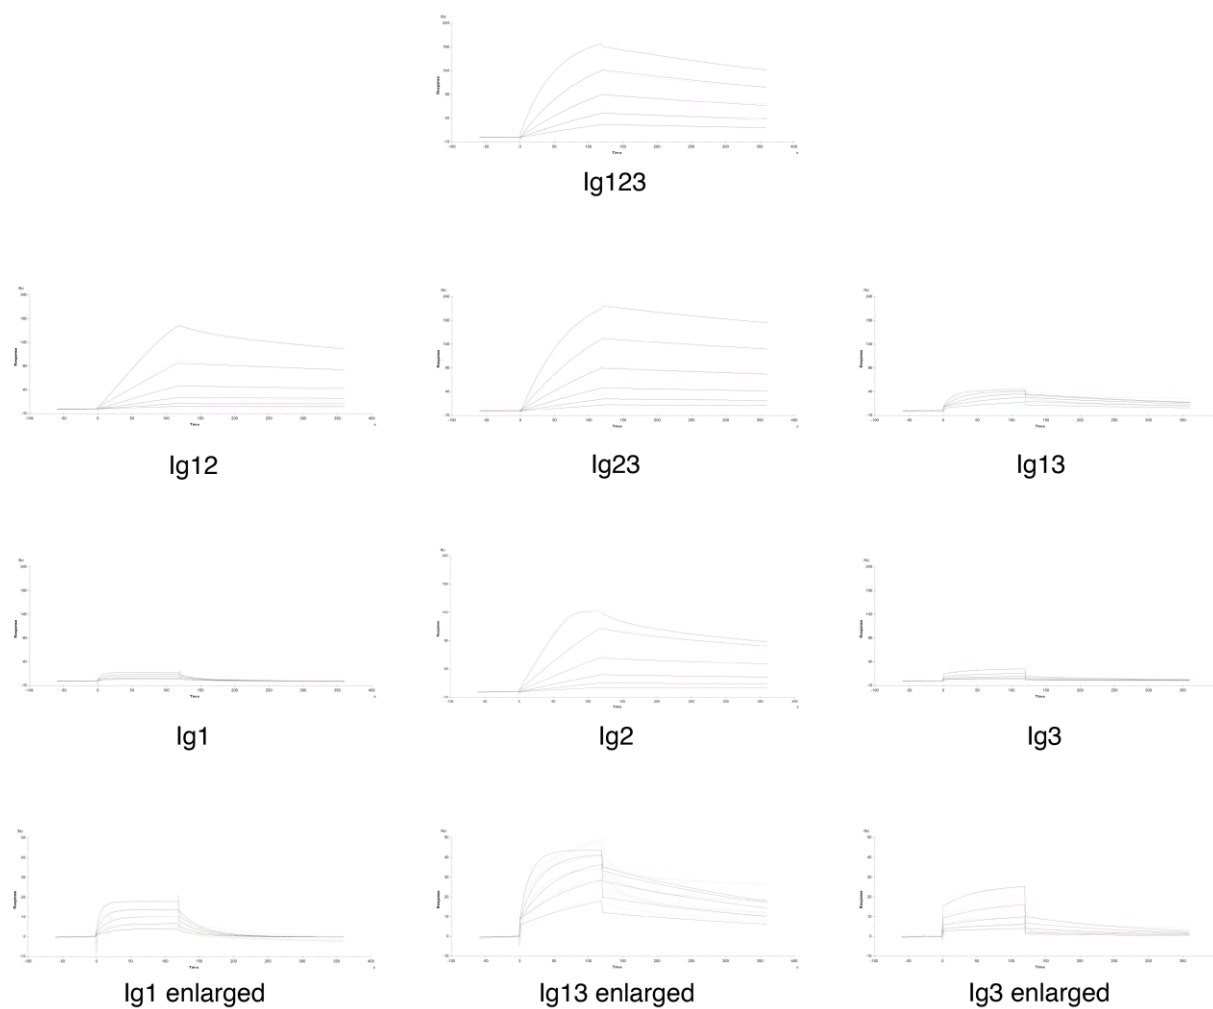

**Figure S1:** Kinetic fit of the binding data.
